# Supplementary material
Source: PubMed Central journal article supplement (PMC4926968)

**SUPPLEMENTAL TABLES AND FIGURES**

**Supplemental Table 1a. Baseline patient characteristics by quartile of urine NGAL/urine creatinine in random subcohort (N=489)**

| Characteristics                                                          | Quartiles of Urine NGAL Standardized to Urine Creatinine |                                                              |                                                              |                                                              |                                                               | p-value |
|--------------------------------------------------------------------------|----------------------------------------------------------|--------------------------------------------------------------|--------------------------------------------------------------|--------------------------------------------------------------|---------------------------------------------------------------|---------|
|                                                                          | Overall<br>(N=489)                                       | 1st Quartile<br>0.004-0.079 ng/mL /<br>Cr (mg/dL)<br>(N=123) | 2nd Quartile<br>0.079-0.209 ng/mL /<br>Cr (mg/dL)<br>(N=122) | 3rd Quartile<br>0.209-0.493 ng/mL /<br>Cr (mg/dL)<br>(N=121) | 4th Quartile<br>0.493-56.995 ng/mL<br>/ Cr (mg/dL)<br>(N=123) |         |
| Age (yr)                                                                 | 51.4 ± 9.0                                               | 51.4 ± 9.4                                                   | 51.1 ± 8.6                                                   | 51.7 ± 8.7                                                   | 51.5 ± 9.5                                                    | 0.96    |
| Women                                                                    | 189(39%)                                                 | 19(15%)                                                      | 27(22%)                                                      | 61(50%)                                                      | 82(67%)                                                       | <0.001  |
| <b>Race</b>                                                              |                                                          |                                                              |                                                              |                                                              |                                                               | 0.64    |
| White                                                                    | 371(76%)                                                 | 98(80%)                                                      | 96(79%)                                                      | 89(74%)                                                      | 88(72%)                                                       |         |
| Black                                                                    | 86(18%)                                                  | 18(15%)                                                      | 21(17%)                                                      | 23(19%)                                                      | 24(20%)                                                       |         |
| Other                                                                    | 32(7%)                                                   | 7(6%)                                                        | 5(4%)                                                        | 9(7%)                                                        | 11(9%)                                                        |         |
| <b>Treatment group</b>                                                   |                                                          |                                                              |                                                              |                                                              |                                                               | 0.78    |
| High dose vitamin                                                        | 242(49%)                                                 | 58(47%)                                                      | 63(52%)                                                      | 57(47%)                                                      | 64(52%)                                                       |         |
| Low dose vitamin                                                         | 247(51%)                                                 | 65(53%)                                                      | 59(48%)                                                      | 64(53%)                                                      | 59(48%)                                                       |         |
| <b>Country</b>                                                           |                                                          |                                                              |                                                              |                                                              |                                                               | 0.87    |
| United States                                                            | 338(69%)                                                 | 85(69%)                                                      | 82(67%)                                                      | 82(68%)                                                      | 89(72%)                                                       |         |
| Canada                                                                   | 59(12%)                                                  | 15(12%)                                                      | 13(11%)                                                      | 15(12%)                                                      | 16(13%)                                                       |         |
| Brazil                                                                   | 92(19%)                                                  | 23(19%)                                                      | 27(22%)                                                      | 24(20%)                                                      | 18(15%)                                                       |         |
| <b>Graft vintage (yr), median<br/>(25<sup>th</sup>, 75<sup>th</sup>)</b> | 3.8 (1.7, 7.0)                                           | 4.0 (2.0, 7.1)                                               | 3.6 (1.6, 8.0)                                               | 3.8 (1.8, 5.9)                                               | 4.0 (1.3, 7.5)                                                | 0.54    |
| <b>Living donor kidney</b>                                               | 207(42%)                                                 | 62(50%)                                                      | 54(44%)                                                      | 49(40%)                                                      | 42(34%)                                                       | 0.07    |
| <b>History of cardiovascular<br/>disease</b>                             | 94(19%)                                                  | 20(16%)                                                      | 21(17%)                                                      | 32(26%)                                                      | 21(17%)                                                       | 0.14    |
| <b>History of diabetes mellitus</b>                                      | 179(37%)                                                 | 46(37%)                                                      | 45(37%)                                                      | 50(41%)                                                      | 38(31%)                                                       | 0.40    |
| <b>Smoking</b>                                                           |                                                          |                                                              |                                                              |                                                              |                                                               | 0.73    |
| Never                                                                    | 243(50%)                                                 | 58(47%)                                                      | 68(56%)                                                      | 56(46%)                                                      | 61(50%)                                                       |         |
| Current                                                                  | 58(12%)                                                  | 13(11%)                                                      | 12(10%)                                                      | 17(14%)                                                      | 16(13%)                                                       |         |
| Former                                                                   | 188(38%)                                                 | 52(42%)                                                      | 42(34%)                                                      | 48(40%)                                                      | 46(37%)                                                       |         |
| <b>Calcineurin inhibitor use</b>                                         | 430(88%)                                                 | 108(88%)                                                     | 109(89%)                                                     | 108(89%)                                                     | 105(85%)                                                      | 0.75    |
| <b>Sirolimus use</b>                                                     | 49(10%)                                                  | 10(8%)                                                       | 10(8%)                                                       | 14(12%)                                                      | 15(12%)                                                       | 0.59    |
| <b>Systolic blood pressure (mm<br/>Hg)</b>                               | 135.7 ± 20.0                                             | 135.1 ± 17.3                                                 | 133.7 ± 18.8                                                 | 137.1 ± 19.0                                                 | 136.9 ± 24.3                                                  | 0.49    |
| <b>Diastolic blood pressure (mm<br/>Hg)</b>                              | 79.2 ± 12.5                                              | 79.5 ± 12.2                                                  | 78.1 ± 11.7                                                  | 79.0 ± 11.4                                                  | 80.2 ± 14.6                                                   | 0.60    |
| <b>Body mass index (kg/m<sup>2</sup>)</b>                                | 29.0 ± 5.9                                               | 29.6 ± 5.9                                                   | 28.3 ± 5.0                                                   | 28.8 ± 6.7                                                   | 29.2 ± 6.0                                                    | 0.38    |

**Quartiles of Urine NGAL Standardized to Urine Creatinine**

| Characteristics                                                                         | Overall<br>(N=489)  | 1st Quartile                                 | 2nd Quartile                                 | 3rd Quartile                                 | 4th Quartile                                  | p-value |
|-----------------------------------------------------------------------------------------|---------------------|----------------------------------------------|----------------------------------------------|----------------------------------------------|-----------------------------------------------|---------|
|                                                                                         |                     | 0.004-0.079 ng/mL /<br>Cr (mg/dL)<br>(N=123) | 0.079-0.209 ng/mL /<br>Cr (mg/dL)<br>(N=122) | 0.209-0.493 ng/mL /<br>Cr (mg/dL)<br>(N=121) | 0.493-56.995 ng/mL<br>/ Cr (mg/dL)<br>(N=123) |         |
| <b>HDL cholesterol (mg/dL)</b>                                                          | 46.8 ± 14.5         | 47.2 ± 12.4                                  | 45.6 ± 14.0                                  | 45.6 ± 14.3                                  | 48.9 ± 16.7                                   | 0.24    |
| <b>LDL cholesterol (mg/dL)</b>                                                          | 103.6 ± 33.1        | 106.3 ± 31.4                                 | 99.3 ± 30.9                                  | 106.9 ± 32.0                                 | 101.8 ± 37.4                                  | 0.22    |
| <b>Triglycerides (mg/dL)</b>                                                            | 199.2 ± 133.4       | 186.5 ± 98.8                                 | 185.7 ± 122.2                                | 217.4 ± 146.1                                | 207.2 ± 157.7                                 | 0.17    |
| <b>eGFR (mL/min/1.73m<sup>2</sup>)*</b>                                                 | 46.0 ± 18.1         | 50.7 ± 17.2                                  | 48.8 ± 18.5                                  | 43.0 ± 16.7                                  | 41.3 ± 18.3                                   | <0.001  |
| <b>Albumin Creatinine Ratio<br/>(mcg/mg), median (25<sup>th</sup>, 75<sup>th</sup>)</b> | 24.5 (9.5, 104.7)   | 13.5 (6.2, 33.9)                             | 19.6 (7.9, 104.7)                            | 23.6 (9.6, 102.2)                            | 62.9 (20.1, 341.8)                            | <0.001  |
| <b>IL18 (pg/mL), median (25<sup>th</sup>,<br/>75<sup>th</sup>)</b>                      | 29.1 (11.5, 62.5)   | 17.1 (5.2, 32.4)                             | 31.3 (12.0, 62.2)                            | 34.9 (18.9, 75.2)                            | 43.8 (18.4, 102.3)                            | <0.001  |
| <b>IL18 (pg/mL) / Cr (mg/dL),<br/>median (25<sup>th</sup>, 75<sup>th</sup>)</b>         | 0.3 (0.1, 0.7)      | 0.2 (0.1, 0.3)                               | 0.3 (0.1, 0.6)                               | 0.3 (0.2, 0.6)                               | 0.6 (0.3, 1.2)                                | <0.001  |
| <b>KIM-1 (pg/mL), median<br/>(25<sup>th</sup>, 75<sup>th</sup>)</b>                     | 658.3 (319.3, 1364) | 542.4 (247.3, 1054)                          | 678.0 (353.3, 1303)                          | 721.3 (452.0, 1557)                          | 633.3 (281.2, 1654)                           | 0.04    |
| <b>KIM-1 (pg/mL) / Cr (mg/dL),<br/>median (25<sup>th</sup>, 75<sup>th</sup>)</b>        | 7.3 (3.8, 12.8)     | 5.6 (3.1, 8.2)                               | 6.8 (3.8, 10.9)                              | 8.7 (4.8, 13.4)                              | 9.9 (3.9, 16.0)                               | <0.001  |
| <b>L-FABP (ng/mL), median<br/>(25<sup>th</sup>, 75<sup>th</sup>)</b>                    | 6.1 (3.0, 17.6)     | 3.6 (1.5, 6.8)                               | 5.8 (3.1, 14.6)                              | 7.6 (3.4, 20.1)                              | 15.1 (3.9, 49.2)                              | <0.001  |
| <b>L-FABP (ng/mL) / Cr<br/>(mg/dL), median (25<sup>th</sup>, 75<sup>th</sup>)</b>       | 0.1 (0.0, 0.2)      | 0.0 (0.0, 0.1)                               | 0.1 (0.0, 0.1)                               | 0.1 (0.0, 0.2)                               | 0.2 (0.1, 0.6)                                | <0.001  |

**Supplemental Table 1b. Baseline patient characteristics by quartile of urine KIM-1/urine creatinine in random subcohort (N=489)**

| Characteristics                                                          | Quartiles of Urine KIM-1 Standardized to Urine Creatinine |                                                              |                                                              |                                                               |                                                                | p-value |
|--------------------------------------------------------------------------|-----------------------------------------------------------|--------------------------------------------------------------|--------------------------------------------------------------|---------------------------------------------------------------|----------------------------------------------------------------|---------|
|                                                                          | Overall<br>(N=489)                                        | 1st Quartile<br>0.096-3.833 pg/mL /<br>Cr (mg/dL)<br>(N=123) | 2nd Quartile<br>3.833-7.256 pg/mL /<br>Cr (mg/dL)<br>(N=121) | 3rd Quartile<br>7.256-12.833 pg/mL<br>/ Cr (mg/dL)<br>(N=122) | 4th Quartile<br>12.833-66.462<br>pg/mL / Cr (mg/dL)<br>(N=123) |         |
| Age (yr)                                                                 | 51.4 ± 9.0                                                | 50.4 ± 8.9                                                   | 51.4 ± 9.1                                                   | 50.7 ± 8.6                                                    | 53.1 ± 9.3                                                     | 0.09    |
| Women                                                                    | 189(39%)                                                  | 40(33%)                                                      | 35(29%)                                                      | 53(43%)                                                       | 61(50%)                                                        | 0.003   |
| <b>Race</b>                                                              |                                                           |                                                              |                                                              |                                                               |                                                                | 0.27    |
| White                                                                    | 371(76%)                                                  | 95(77%)                                                      | 92(76%)                                                      | 90(74%)                                                       | 94(76%)                                                        |         |
| Black                                                                    | 86(18%)                                                   | 24(20%)                                                      | 24(20%)                                                      | 20(16%)                                                       | 18(15%)                                                        |         |
| Other                                                                    | 32(7%)                                                    | 4(3%)                                                        | 5(4%)                                                        | 12(10%)                                                       | 11(9%)                                                         |         |
| <b>Treatment group</b>                                                   |                                                           |                                                              |                                                              |                                                               |                                                                | 0.80    |
| High dose vitamin                                                        | 242(49%)                                                  | 61(50%)                                                      | 61(50%)                                                      | 56(46%)                                                       | 64(52%)                                                        |         |
| Low dose vitamin                                                         | 247(51%)                                                  | 62(50%)                                                      | 60(50%)                                                      | 66(54%)                                                       | 59(48%)                                                        |         |
| <b>Location</b>                                                          |                                                           |                                                              |                                                              |                                                               |                                                                | 0.25    |
| United States                                                            | 338(69%)                                                  | 95(77%)                                                      | 80(66%)                                                      | 79(65%)                                                       | 84(68%)                                                        |         |
| Canada                                                                   | 59(12%)                                                   | 9(7%)                                                        | 14(12%)                                                      | 17(14%)                                                       | 19(15%)                                                        |         |
| Brazil                                                                   | 92(19%)                                                   | 19(15%)                                                      | 27(22%)                                                      | 26(21%)                                                       | 20(16%)                                                        |         |
| <b>Graft vintage (yr), median<br/>(25<sup>th</sup>, 75<sup>th</sup>)</b> | 3.8 (1.7, 7.0)                                            | 3.6 (1.9, 7.3)                                               | 3.9 (2.0, 7.7)                                               | 3.8 (1.5, 7.0)                                                | 4.0 (1.5, 6.8)                                                 | 0.79    |
| Living donor kidney                                                      | 207(42%)                                                  | 64(52%)                                                      | 48(40%)                                                      | 52(43%)                                                       | 43(35%)                                                        | 0.050   |
| History of cardiovascular disease                                        | 94(19%)                                                   | 27(22%)                                                      | 12(10%)                                                      | 26(21%)                                                       | 29(24%)                                                        | 0.03    |
| History of diabetes mellitus                                             | 179(37%)                                                  | 41(33%)                                                      | 40(33%)                                                      | 46(38%)                                                       | 52(42%)                                                        | 0.39    |
| <b>Smoking</b>                                                           |                                                           |                                                              |                                                              |                                                               |                                                                | 0.27    |
| Never                                                                    | 243(50%)                                                  | 57(46%)                                                      | 65(54%)                                                      | 56(46%)                                                       | 65(53%)                                                        |         |
| Current                                                                  | 58(12%)                                                   | 18(15%)                                                      | 7(6%)                                                        | 16(13%)                                                       | 17(14%)                                                        |         |
| Former                                                                   | 188(38%)                                                  | 48(39%)                                                      | 49(40%)                                                      | 50(41%)                                                       | 41(33%)                                                        |         |
| Calcineurin inhibitor use                                                | 430(88%)                                                  | 103(84%)                                                     | 107(88%)                                                     | 109(89%)                                                      | 111(90%)                                                       | 0.40    |
| Sirolimus use                                                            | 49(10%)                                                   | 14(11%)                                                      | 9(7%)                                                        | 14(11%)                                                       | 12(10%)                                                        | 0.70    |
| Systolic blood pressure (mm Hg)                                          | 135.7 ± 20.0                                              | 134.6 ± 18.5                                                 | 136.8 ± 20.6                                                 | 135.4 ± 20.8                                                  | 136.1 ± 20.2                                                   | 0.84    |
| Diastolic blood pressure (mm Hg)                                         | 79.2 ± 12.5                                               | 78.5 ± 12.8                                                  | 79.1 ± 12.6                                                  | 79.8 ± 13.6                                                   | 79.5 ± 11.2                                                    | 0.87    |
| Body mass index (kg/m <sup>2</sup> )                                     | 29.0 ± 5.9                                                | 28.6 ± 6.1                                                   | 29.8 ± 6.2                                                   | 29.0 ± 5.8                                                    | 28.6 ± 5.7                                                     | 0.30    |
| HDL cholesterol (mg/dL)                                                  | 46.8 ± 14.5                                               | 46.5 ± 11.8                                                  | 46.7 ± 15.0                                                  | 46.6 ± 14.1                                                   | 47.5 ± 16.7                                                    | 0.95    |
| LDL cholesterol (mg/dL)                                                  | 103.6 ± 33.1                                              | 105.6 ± 29.1                                                 | 100.7 ± 32.2                                                 | 104.1 ± 33.3                                                  | 103.8 ± 37.4                                                   | 0.70    |

**Quartiles of Urine KIM-1 Standardized to Urine Creatinine**

| Characteristics                                                                     | Overall<br>(N=489) | 1st Quartile                                 | 2nd Quartile                                 | 3rd Quartile                                  | 4th Quartile                                   | p-value |
|-------------------------------------------------------------------------------------|--------------------|----------------------------------------------|----------------------------------------------|-----------------------------------------------|------------------------------------------------|---------|
|                                                                                     |                    | 0.096-3.833 pg/mL /<br>Cr (mg/dL)<br>(N=123) | 3.833-7.256 pg/mL /<br>Cr (mg/dL)<br>(N=121) | 7.256-12.833 pg/mL<br>/ Cr (mg/dL)<br>(N=122) | 12.833-66.462<br>pg/mL / Cr (mg/dL)<br>(N=123) |         |
| Triglycerides (mg/dL)                                                               | 199.2 ± 133.4      | 198.1 ± 129.6                                | 206.4 ± 149.3                                | 190.9 ± 114.5                                 | 201.4 ± 138.9                                  | 0.83    |
| eGFR (mL/min/1.73m <sup>2</sup> )*                                                  | 46.0 ± 18.1        | 46.8 ± 17.8                                  | 46.0 ± 15.4                                  | 46.0 ± 18.0                                   | 45.0 ± 20.9                                    | 0.90    |
| Albumin Creatinine Ratio<br>(mcg/mg), median (25 <sup>th</sup> , 75 <sup>th</sup> ) | 24.5 (9.5, 104.7)  | 12.1 (6.4, 41.1)                             | 21.2 (9.5, 80.7)                             | 31.7 (11.2, 124.0)                            | 47.3 (15.9, 367.4)                             | <0.001  |
| IL18 (pg/mL), median (25 <sup>th</sup> ,<br>75 <sup>th</sup> )                      | 29.1 (11.5, 62.5)  | 18.1 (5.2, 50.0)                             | 26.7 (5.2, 60.1)                             | 33.0 (17.1, 58.1)                             | 34.7 (21.4, 73.7)                              | <0.001  |
| IL18 (pg/mL) / Cr (mg/dL),<br>median (25 <sup>th</sup> , 75 <sup>th</sup> )         | 0.3 (0.1, 0.7)     | 0.2 (0.1, 0.6)                               | 0.3 (0.1, 0.6)                               | 0.3 (0.2, 0.6)                                | 0.4 (0.2, 0.8)                                 | 0.01    |
| L-FABP (ng/mL), median<br>(25 <sup>th</sup> , 75 <sup>th</sup> )                    | 6.1 (3.0, 17.6)    | 3.4 (1.5, 8.6)                               | 5.8 (3.2, 15.1)                              | 6.5 (3.4, 15.7)                               | 10.1 (4.2, 29.5)                               | <0.001  |
| L-FABP (ng/mL) / Cr<br>(mg/dL), median (25 <sup>th</sup> , 75 <sup>th</sup> )       | 0.1 (0.0, 0.2)     | 0.0 (0.0, 0.1)                               | 0.1 (0.0, 0.2)                               | 0.1 (0.0, 0.2)                                | 0.1 (0.0, 0.3)                                 | <0.001  |
| NGAL (ng/mL), median<br>(25 <sup>th</sup> , 75 <sup>th</sup> )                      | 20.2 (8.2, 51.3)   | 14.7 (3.5, 37.0)                             | 13.3 (6.8, 30.2)                             | 20.9 (9.2, 47.4)                              | 36.4 (18.7, 92.9)                              | <0.001  |
| NGAL (ng/mL) / Cr (mg/dL),<br>median (25 <sup>th</sup> , 75 <sup>th</sup> )         | 0.2 (0.1, 0.5)     | 0.2 (0.1, 0.5)                               | 0.1 (0.1, 0.3)                               | 0.2 (0.1, 0.4)                                | 0.4 (0.2, 1.0)                                 | <0.001  |

**Supplemental Table 1c. Baseline patient characteristics by quartile of urine IL-18/urine creatinine in random subcohort (N=489)**

| Characteristics                                                          | Quartiles of Urine IL-18 Standardized to Urine Creatinine |                                                              |                                                              |                                                              |                                                              | p-value |
|--------------------------------------------------------------------------|-----------------------------------------------------------|--------------------------------------------------------------|--------------------------------------------------------------|--------------------------------------------------------------|--------------------------------------------------------------|---------|
|                                                                          | Overall<br>(N=489)                                        | 1st Quartile<br>0.025-0.136 pg/mL /<br>Cr (mg/dL)<br>(N=123) | 2nd Quartile<br>0.136-0.294 pg/mL /<br>Cr (mg/dL)<br>(N=121) | 3rd Quartile<br>0.294-0.673 pg/mL /<br>Cr (mg/dL)<br>(N=122) | 4th Quartile<br>0.673-7.623 pg/mL /<br>Cr (mg/dL)<br>(N=123) |         |
| Age (yr)                                                                 | 51.4 ± 9.0                                                | 51.8 ± 9.3                                                   | 51.1 ± 8.7                                                   | 51.1 ± 8.1                                                   | 51.5 ± 9.8                                                   | 0.90    |
| Women                                                                    | 189(39%)                                                  | 22(18%)                                                      | 37(31%)                                                      | 49(40%)                                                      | 81(66%)                                                      | <0.001  |
| <b>Race</b>                                                              |                                                           |                                                              |                                                              |                                                              |                                                              | 0.85    |
| White                                                                    | 371(76%)                                                  | 97(79%)                                                      | 95(79%)                                                      | 90(74%)                                                      | 89(72%)                                                      |         |
| Black                                                                    | 86(18%)                                                   | 19(15%)                                                      | 20(17%)                                                      | 22(18%)                                                      | 25(20%)                                                      |         |
| Other                                                                    | 32(7%)                                                    | 7(6%)                                                        | 6(5%)                                                        | 10(8%)                                                       | 9(7%)                                                        |         |
| <b>Treatment group</b>                                                   |                                                           |                                                              |                                                              |                                                              |                                                              | 0.18    |
| High dose vitamin                                                        | 242(49%)                                                  | 61(50%)                                                      | 57(47%)                                                      | 70(57%)                                                      | 54(44%)                                                      |         |
| Low dose vitamin                                                         | 247(51%)                                                  | 62(50%)                                                      | 64(53%)                                                      | 52(43%)                                                      | 69(56%)                                                      |         |
| <b>Location</b>                                                          |                                                           |                                                              |                                                              |                                                              |                                                              | 0.003   |
| United States                                                            | 338(69%)                                                  | 90(73%)                                                      | 82(68%)                                                      | 83(68%)                                                      | 83(67%)                                                      |         |
| Canada                                                                   | 59(12%)                                                   | 22(18%)                                                      | 17(14%)                                                      | 13(11%)                                                      | 7(6%)                                                        |         |
| Brazil                                                                   | 92(19%)                                                   | 11(9%)                                                       | 22(18%)                                                      | 26(21%)                                                      | 33(27%)                                                      |         |
| <b>Graft vintage (yr), median<br/>(25<sup>th</sup>, 75<sup>th</sup>)</b> | 3.8 (1.7, 7.0)                                            | 5.3 (2.0, 10.0)                                              | 3.7 (1.6, 7.1)                                               | 3.3 (1.4, 5.3)                                               | 3.6 (1.6, 6.6)                                               | 0.003   |
| Living donor kidney                                                      | 207(42%)                                                  | 55(45%)                                                      | 51(42%)                                                      | 50(41%)                                                      | 51(41%)                                                      | 0.94    |
| <b>History of cardiovascular<br/>disease</b>                             | 94(19%)                                                   | 31(25%)                                                      | 22(18%)                                                      | 21(17%)                                                      | 20(16%)                                                      | 0.27    |
| <b>History of diabetes mellitus</b>                                      | 179(37%)                                                  | 49(40%)                                                      | 47(39%)                                                      | 42(34%)                                                      | 41(33%)                                                      | 0.65    |
| <b>Smoking</b>                                                           |                                                           |                                                              |                                                              |                                                              |                                                              | 0.59    |
| Never                                                                    | 243(50%)                                                  | 65(53%)                                                      | 58(48%)                                                      | 61(50%)                                                      | 59(48%)                                                      |         |
| Current                                                                  | 58(12%)                                                   | 14(11%)                                                      | 20(17%)                                                      | 11(9%)                                                       | 13(11%)                                                      |         |
| Former                                                                   | 188(38%)                                                  | 44(36%)                                                      | 43(36%)                                                      | 50(41%)                                                      | 51(41%)                                                      |         |
| <b>Calcineurin inhibitor use</b>                                         | 430(88%)                                                  | 108(88%)                                                     | 105(87%)                                                     | 112(92%)                                                     | 105(85%)                                                     | 0.45    |
| <b>Sirolimus use</b>                                                     | 49(10%)                                                   | 10(8%)                                                       | 13(11%)                                                      | 16(13%)                                                      | 10(8%)                                                       | 0.50    |
| <b>Systolic blood pressure (mm<br/>Hg)</b>                               | 135.7 ± 20.0                                              | 133.1 ± 16.5                                                 | 137.0 ± 19.3                                                 | 135.1 ± 20.6                                                 | 137.6 ± 23.1                                                 | 0.29    |
| <b>Diastolic blood pressure (mm<br/>Hg)</b>                              | 79.2 ± 12.5                                               | 77.1 ± 10.0                                                  | 79.1 ± 11.9                                                  | 79.5 ± 12.8                                                  | 81.2 ± 14.7                                                  | 0.08    |
| <b>Body mass index (kg/m<sup>2</sup>)</b>                                | 29.0 ± 5.9                                                | 28.8 ± 6.0                                                   | 28.7 ± 5.8                                                   | 28.8 ± 5.9                                                   | 29.6 ± 6.2                                                   | 0.55    |
| <b>HDL cholesterol (mg/dL)</b>                                           | 46.8 ± 14.5                                               | 45.9 ± 11.3                                                  | 46.5 ± 14.4                                                  | 48.1 ± 15.4                                                  | 46.9 ± 16.4                                                  | 0.70    |
| <b>LDL cholesterol (mg/dL)</b>                                           | 103.6 ± 33.1                                              | 101.0 ± 30.7                                                 | 107.1 ± 30.8                                                 | 101.2 ± 36.1                                                 | 105.0 ± 34.4                                                 | 0.40    |

**Quartiles of Urine IL-18 Standardized to Urine Creatinine**

| Characteristics                                                                     | Overall<br>(N=489)  | Quartiles of Urine IL-18 Standardized to Urine Creatinine    |                                                              |                                                              |                                                              | p-value |
|-------------------------------------------------------------------------------------|---------------------|--------------------------------------------------------------|--------------------------------------------------------------|--------------------------------------------------------------|--------------------------------------------------------------|---------|
|                                                                                     |                     | 1st Quartile<br>0.025-0.136 pg/mL /<br>Cr (mg/dL)<br>(N=123) | 2nd Quartile<br>0.136-0.294 pg/mL /<br>Cr (mg/dL)<br>(N=121) | 3rd Quartile<br>0.294-0.673 pg/mL /<br>Cr (mg/dL)<br>(N=122) | 4th Quartile<br>0.673-7.623 pg/mL /<br>Cr (mg/dL)<br>(N=123) |         |
| Triglycerides (mg/dL)                                                               | 199.2 ± 133.4       | 193.3 ± 108.8                                                | 195.2 ± 136.3                                                | 197.3 ± 124.2                                                | 210.8 ± 159.7                                                | 0.73    |
| eGFR (mL/min/1.73m <sup>2</sup> )*                                                  | 46.0 ± 18.1         | 44.3 ± 17.6                                                  | 48.0 ± 17.9                                                  | 47.7 ± 19.8                                                  | 43.8 ± 16.7                                                  | 0.14    |
| Albumin Creatinine Ratio<br>(mcg/mg), median (25 <sup>th</sup> , 75 <sup>th</sup> ) | 24.5 (9.5, 104.7)   | 13.9 (7.0, 47.3)                                             | 21.7 (8.2, 87.9)                                             | 27.9 (10.2, 138.4)                                           | 45.6 (15.3, 255.5)                                           | <0.001  |
| KIM-1 (pg/mL), median<br>(25 <sup>th</sup> , 75 <sup>th</sup> )                     | 658.3 (319.3, 1364) | 536.6 (232.4, 1178)                                          | 666.0 (324.3, 1302)                                          | 830.4 (452.0, 1478)                                          | 605.6 (330.3, 1449)                                          | 0.02    |
| KIM-1 (pg/mL) / Cr (mg/dL),<br>median (25 <sup>th</sup> , 75 <sup>th</sup> )        | 7.3 (3.8, 12.8)     | 5.0 (2.5, 10.7)                                              | 6.8 (3.7, 10.7)                                              | 8.6 (5.2, 14.0)                                              | 7.6 (3.9, 14.6)                                              | <0.001  |
| L-FABP (ng/mL), median<br>(25 <sup>th</sup> , 75 <sup>th</sup> )                    | 6.1 (3.0, 17.6)     | 4.0 (1.5, 8.4)                                               | 5.8 (3.1, 11.4)                                              | 7.0 (3.2, 23.4)                                              | 10.7 (3.4, 26.6)                                             | <0.001  |
| L-FABP (ng/mL) / Cr<br>(mg/dL), median (25 <sup>th</sup> , 75 <sup>th</sup> )       | 0.1 (0.0, 0.2)      | 0.0 (0.0, 0.1)                                               | 0.1 (0.0, 0.1)                                               | 0.1 (0.0, 0.2)                                               | 0.1 (0.1, 0.4)                                               | <0.001  |
| NGAL (ng/mL), median<br>(25 <sup>th</sup> , 75 <sup>th</sup> )                      | 20.2 (8.2, 51.3)    | 10.3 (3.8, 23.0)                                             | 17.6 (7.2, 39.7)                                             | 22.9 (9.2, 51.4)                                             | 35.2 (15.2, 117.8)                                           | <0.001  |
| NGAL (ng/mL) / Cr (mg/dL),<br>median (25 <sup>th</sup> , 75 <sup>th</sup> )         | 0.2 (0.1, 0.5)      | 0.1 (0.0, 0.3)                                               | 0.2 (0.1, 0.4)                                               | 0.2 (0.1, 0.5)                                               | 0.5 (0.2, 1.4)                                               | <0.001  |

**Supplemental Table 1d. Baseline patient characteristics by quartile of urine L-FABP/urine creatinine in random subcohort (N=489)**

| Characteristics                                                          | Quartiles of Urine L-FABP Standardized to Urine Creatinine |                                                              |                                                              |                                                              |                                                              | p-value |
|--------------------------------------------------------------------------|------------------------------------------------------------|--------------------------------------------------------------|--------------------------------------------------------------|--------------------------------------------------------------|--------------------------------------------------------------|---------|
|                                                                          | Overall<br>(N=489)                                         | 1st Quartile<br>0.007-0.032 ng/mL /<br>Cr (mg/dL)<br>(N=123) | 2nd Quartile<br>0.032-0.057 ng/mL /<br>Cr (mg/dL)<br>(N=122) | 3rd Quartile<br>0.057-0.190 ng/mL /<br>Cr (mg/dL)<br>(N=121) | 4th Quartile<br>0.190-5.049 ng/mL /<br>Cr (mg/dL)<br>(N=123) |         |
| Age (yr)                                                                 | 51.4 ± 9.0                                                 | 50.4 ± 8.9                                                   | 52.0 ± 9.5                                                   | 51.7 ± 8.7                                                   | 51.5 ± 9.0                                                   | 0.56    |
| Women                                                                    | 189(39%)                                                   | 36(29%)                                                      | 55(45%)                                                      | 54(45%)                                                      | 44(36%)                                                      | 0.03    |
| <b>Race</b>                                                              |                                                            |                                                              |                                                              |                                                              |                                                              | 0.24    |
| White                                                                    | 371(76%)                                                   | 101(82%)                                                     | 91(75%)                                                      | 94(78%)                                                      | 85(69%)                                                      |         |
| Black                                                                    | 86(18%)                                                    | 18(15%)                                                      | 24(20%)                                                      | 18(15%)                                                      | 26(21%)                                                      |         |
| Other                                                                    | 32(7%)                                                     | 4(3%)                                                        | 7(6%)                                                        | 9(7%)                                                        | 12(10%)                                                      |         |
| <b>Treatment group</b>                                                   |                                                            |                                                              |                                                              |                                                              |                                                              | 0.37    |
| High dose vitamin                                                        | 242(49%)                                                   | 59(48%)                                                      | 68(56%)                                                      | 54(45%)                                                      | 61(50%)                                                      |         |
| Low dose vitamin                                                         | 247(51%)                                                   | 64(52%)                                                      | 54(44%)                                                      | 67(55%)                                                      | 62(50%)                                                      |         |
| <b>Location</b>                                                          |                                                            |                                                              |                                                              |                                                              |                                                              | 0.50    |
| United States                                                            | 338(69%)                                                   | 83(67%)                                                      | 88(72%)                                                      | 86(71%)                                                      | 81(66%)                                                      |         |
| Canada                                                                   | 59(12%)                                                    | 15(12%)                                                      | 18(15%)                                                      | 13(11%)                                                      | 13(11%)                                                      |         |
| Brazil                                                                   | 92(19%)                                                    | 25(20%)                                                      | 16(13%)                                                      | 22(18%)                                                      | 29(24%)                                                      |         |
| <b>Graft vintage (yr), median<br/>(25<sup>th</sup>, 75<sup>th</sup>)</b> | 3.8 (1.7, 7.0)                                             | 4.0 (1.9, 7.3)                                               | 3.6 (1.6, 7.0)                                               | 4.1 (1.7, 7.1)                                               | 3.5 (1.5, 6.7)                                               | 0.82    |
| Living donor kidney                                                      | 207(42%)                                                   | 50(41%)                                                      | 53(43%)                                                      | 50(41%)                                                      | 54(44%)                                                      | 0.94    |
| <b>History of cardiovascular<br/>disease</b>                             | 94(19%)                                                    | 16(13%)                                                      | 23(19%)                                                      | 25(21%)                                                      | 30(24%)                                                      | 0.15    |
| <b>History of diabetes mellitus</b>                                      | 179(37%)                                                   | 40(33%)                                                      | 41(34%)                                                      | 47(39%)                                                      | 51(41%)                                                      | 0.41    |
| <b>Smoking</b>                                                           |                                                            |                                                              |                                                              |                                                              |                                                              | 0.42    |
| Never                                                                    | 243(50%)                                                   | 71(58%)                                                      | 60(49%)                                                      | 55(45%)                                                      | 57(46%)                                                      |         |
| Current                                                                  | 58(12%)                                                    | 10(8%)                                                       | 13(11%)                                                      | 17(14%)                                                      | 18(15%)                                                      |         |
| Former                                                                   | 188(38%)                                                   | 42(34%)                                                      | 49(40%)                                                      | 49(40%)                                                      | 48(39%)                                                      |         |
| <b>Calcineurin inhibitor use</b>                                         | 430(88%)                                                   | 108(88%)                                                     | 109(89%)                                                     | 112(93%)                                                     | 101(82%)                                                     | 0.09    |
| <b>Sirolimus use</b>                                                     | 49(10%)                                                    | 8(7%)                                                        | 10(8%)                                                       | 8(7%)                                                        | 23(19%)                                                      | 0.003   |
| <b>Systolic blood pressure (mm<br/>Hg)</b>                               | 135.7 ± 20.0                                               | 131.7 ± 18.1                                                 | 132.8 ± 18.4                                                 | 134.8 ± 19.8                                                 | 143.5 ± 21.6                                                 | <0.001  |
| <b>Diastolic blood pressure (mm<br/>Hg)</b>                              | 79.2 ± 12.5                                                | 76.5 ± 11.6                                                  | 77.4 ± 11.1                                                  | 79.8 ± 12.8                                                  | 83.1 ± 13.6                                                  | <0.001  |
| <b>Body mass index (kg/m<sup>2</sup>)</b>                                | 29.0 ± 5.9                                                 | 28.2 ± 5.4                                                   | 29.4 ± 6.7                                                   | 28.9 ± 5.6                                                   | 29.5 ± 5.9                                                   | 0.30    |
| <b>HDL cholesterol (mg/dL)</b>                                           | 46.8 ± 14.5                                                | 46.4 ± 12.7                                                  | 49.1 ± 15.0                                                  | 44.8 ± 11.7                                                  | 47.0 ± 17.6                                                  | 0.14    |
| <b>LDL cholesterol (mg/dL)</b>                                           | 103.6 ± 33.1                                               | 104.9 ± 30.9                                                 | 101.1 ± 29.0                                                 | 101.6 ± 33.9                                                 | 106.6 ± 37.9                                                 | 0.51    |

**Quartiles of Urine L-FABP Standardized to Urine Creatinine**

| Characteristics                                                                     | Overall<br>(N=489)  | 1st Quartile                                 | 2nd Quartile                                 | 3rd Quartile                                 | 4th Quartile                                 | p-value |
|-------------------------------------------------------------------------------------|---------------------|----------------------------------------------|----------------------------------------------|----------------------------------------------|----------------------------------------------|---------|
|                                                                                     |                     | 0.007-0.032 ng/mL /<br>Cr (mg/dL)<br>(N=123) | 0.032-0.057 ng/mL /<br>Cr (mg/dL)<br>(N=122) | 0.057-0.190 ng/mL /<br>Cr (mg/dL)<br>(N=121) | 0.190-5.049 ng/mL /<br>Cr (mg/dL)<br>(N=123) |         |
| Triglycerides (mg/dL)                                                               | 199.2 ± 133.4       | 179.1 ± 109.5                                | 194.7 ± 120.4                                | 197.5 ± 110.2                                | 225.3 ± 178.1                                | 0.053   |
| eGFR (mL/min/1.73m <sup>2</sup> )*                                                  | 46.0 ± 18.1         | 51.9 ± 18.1                                  | 47.9 ± 18.0                                  | 43.4 ± 15.9                                  | 40.6 ± 18.4                                  | <0.001  |
| Albumin Creatinine Ratio<br>(mcg/mg), median (25 <sup>th</sup> , 75 <sup>th</sup> ) | 24.5 (9.5, 104.7)   | 10.4 (5.8, 20.5)                             | 13.7 (7.4, 41.1)                             | 28.7 (11.6, 133.8)                           | 161.6 (48.2, 680.3)                          | <0.001  |
| IL18 (pg/mL), median (25 <sup>th</sup> ,<br>75 <sup>th</sup> )                      | 29.1 (11.5, 62.5)   | 23.0 (5.2, 48.9)                             | 24.8 (10.3, 43.7)                            | 33.3 (13.6, 90.5)                            | 34.7 (18.4, 81.6)                            | 0.001   |
| IL18 (pg/mL) / Cr (mg/dL),<br>median (25 <sup>th</sup> , 75 <sup>th</sup> )         | 0.3 (0.1, 0.7)      | 0.2 (0.1, 0.4)                               | 0.2 (0.1, 0.5)                               | 0.4 (0.2, 0.8)                               | 0.5 (0.2, 1.0)                               | <0.001  |
| KIM-1 (pg/mL), median<br>(25 <sup>th</sup> , 75 <sup>th</sup> )                     | 658.3 (319.3, 1364) | 706.9 (301.0, 1335)                          | 544.7 (249.3, 1067)                          | 797.4 (377.4, 1478)                          | 699.6 (424.1, 1517)                          | 0.03    |
| KIM-1 (pg/mL) / Cr (mg/dL),<br>median (25 <sup>th</sup> , 75 <sup>th</sup> )        | 7.3 (3.8, 12.8)     | 5.5 (2.8, 11.7)                              | 6.4 (3.3, 9.8)                               | 7.5 (4.2, 13.1)                              | 8.8 (5.1, 15.8)                              | <0.001  |
| NGAL(ng/mL), median (25 <sup>th</sup> ,<br>75 <sup>th</sup> )                       | 20.2 (8.2, 51.3)    | 14.5 (4.2, 38.7)                             | 14.7 (5.5, 27.3)                             | 18.9 (8.9, 44.1)                             | 41.1 (19.6, 104.9)                           | <0.001  |
| NGAL (ng/mL) / Cr (mg/dL),<br>median (25 <sup>th</sup> , 75 <sup>th</sup> )         | 0.2 (0.1, 0.5)      | 0.1 (0.0, 0.3)                               | 0.2 (0.1, 0.3)                               | 0.2 (0.1, 0.4)                               | 0.5 (0.2, 1.4)                               | <0.001  |



**Supplemental Table 2. Multivariable associations of urine biomarkers with cardiovascular disease and death, excluding prevalent cardiovascular disease at study entry**

| <b>Urine biomarker</b> | <b>Cardiovascular events<br/>HR (95% CI)*</b> | <b>All-cause death<br/>HR (95% CI)*</b> |
|------------------------|-----------------------------------------------|-----------------------------------------|
| NGAL/ creatinine       | 1.18 (0.96, 1.44)                             | 1.46 (1.24, 1.74)**                     |
| KIM-1/ creatinine      | 1.20 (0.89, 1.63)                             | 1.28 (0.97, 1.69)                       |
| IL-18/ creatinine      | 0.88 (0.70,1.10)                              | 1.04 (0.84, 1.28)                       |
| L-FABP/ creatinine     | 0.95 (0.77, 1.19)                             | 1.14 (0.92, 1.41)                       |

\*Per log increase of urine biomarker, adjusted for demographics, treatment, country, diabetes, smoking, graft vintage, donor, blood pressure, lipids, BMI, eGFR, urine ACR

\*\*p<0.05

**Supplemental Table 3. Multivariable associations of urine biomarkers (not standardized to urine creatinine) with risk of cardiovascular events, graft failure and all-cause death**

| <b>Urine biomarker</b> | <b>Cardiovascular events</b> | <b>Graft failure</b>       | <b>All-cause death</b>     |
|------------------------|------------------------------|----------------------------|----------------------------|
|                        | <b>HR (95% CI)*</b>          | <b>HR (95% CI)**</b>       | <b>HR (95% CI)*</b>        |
| NGAL                   | <b>1.24 (1.06,1.44)†</b>     | <b>1.30 (1.07, 1.57) †</b> | <b>1.40 (1.23, 1.61) †</b> |
| KIM-1                  | 1.11 (0.94, 1.32)            | 0.92 (0.77, 1.11)          | 1.14 (0.97, 1.34)          |
| IL-18                  | 1.06 (0.89,1.27)             | 1.08 (0.89, 1.31)          | <b>1.23 (1.04,1.46) †</b>  |
| L-FABP                 | 1.04 (0.87, 1.24)            | 1.01 (0.81, 1.26)          | 1.11 (0.94, 1.32)          |

\*Per log increase of urine biomarker, adjusted for demographics, treatment, country, history of CVD, diabetes, smoking, graft vintage, donor, blood pressure, lipids, BMI, eGFR, urine ACR

\*\*Per log increase of urine biomarker, adjusted for demographics, treatment, country, diabetes, smoking, graft vintage, donor, blood pressure, BMI, eGFR, urine ACR

†p<0.05

**Supplemental Table 4. Adjusted hazard ratio estimates for cardiovascular events, graft failure and death according to urine biomarker, using a composite outcome**

| <b>Urine biomarker/Cr</b> | <b>Risk of cardiovascular events or all-cause mortality*</b> | <b>Risk of graft failure or all-cause mortality*</b> |
|---------------------------|--------------------------------------------------------------|------------------------------------------------------|
| <b>NGAL/Cr</b>            | <b>1.35 (1.19, 1.53)</b>                                     | <b>1.42 (1.25, 1.62)</b>                             |
| <b>KIM-1/Cr</b>           | 1.19 (0.98, 1.44)                                            | 1.18 (0.96, 1.45)                                    |
| <b>IL-18/Cr</b>           | 1.13 (0.96, 1.33)                                            | <b>1.21 (1.03, 1.42)</b>                             |
| <b>L-FABP/Cr</b>          | 1.10 (0.93, 1.30)                                            | 1.12 (0.95, 1.33)                                    |

\*Adjusted for demographics, treatment, country, history of CVD, diabetes, smoking, graft vintage, donor, blood pressure, lipids, BMI, eGFR, urine ACR

**Supplemental Figure 1. Scatterplots of estimated glomerular filtration rate and urine albumin to creatinine ratio with each urine injury biomarker (from random subcohort N=489)**

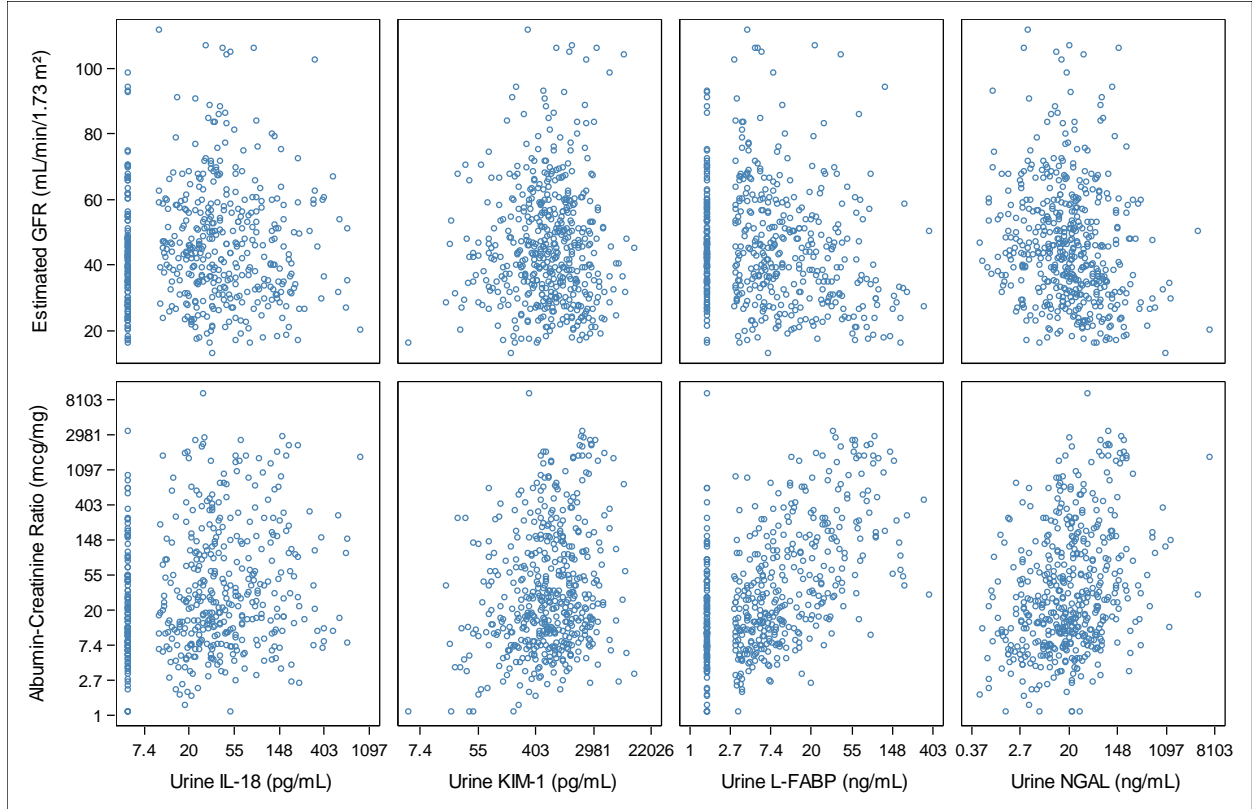

Supplement: ASN.2015030292_ASN2015030292SupplementaryData.pdf [file ASN.2015030292_ASN2015030292SupplementaryData.pdf]
